# Supplementary material for: The Solvation Effect of C=O Group of Cyclic Anhydrides in Solution
Source: MDPI journal article supplement (doi:10.3390/ijms24076724), 2023-04-04
Supplement: s1 [file s1]

SUPPLEMENTARY MATERIAL

**The solvation effect of C=O group of cyclic anhydrides in solution**

Ilnaz T. Rakipov<sup>\*</sup>, Artem A. Petrov, Aydar A. Akhmediyarov, Artashes A. Khachatrian, Boris. N. Solomonov

*Department of Physical Chemistry, Kazan Federal University, Kremlevskaya 18, Kazan, 420008, Russia*

<sup>1</sup>To whom correspondence concerning the solution calorimetry experiments and hydrogen bond analysis should be addressed, E-mail: [ilnaz0805@gmail.com](mailto:ilnaz0805@gmail.com)

Table S1. The correlation parameters between the frequencies of the C=O groups of alanine and sarcosine anhydride in solvents and the parameter  $S_{\nu W}$ .

| Anhydrides          | $a$   | $b$    | R     | S <sub>D</sub> | N  |
|---------------------|-------|--------|-------|----------------|----|
| Alanine anhydride   | -3.00 | 1697.3 | 0.991 | 0.40           | 11 |
| Sarcosine anhydride | -4.32 | 1688.7 | 0.992 | 0.54           | 11 |

Table S2. Parameters of correlation (R, correlation coefficient; S<sub>0</sub>, standard deviation) between the frequencies of the C=O groups in the complexes of alanine and sarcosine anhydride with methanol in aprotic solvents and the parameter  $S_{\nu W}$ .

| Anhydrides          | $a$   | $b$    | R     | S <sub>D</sub> | N |
|---------------------|-------|--------|-------|----------------|---|
| Alanine anhydride   | -2.58 | 1680.5 | 0.995 | 0.27           | 4 |
| Sarcosine anhydride | -3.71 | 1676.2 | 0.999 | 0.12           | 4 |
